# Supplementary material
Source: PubMed Central journal article supplement (PMC4815094)
Supplement: supp_tpc.15.00492_DRYAD_NOTICE.pdf [file supp_tpc.15.00492_DRYAD_NOTICE.pdf]

Supplemental Datasets for this article have been deposited in DRYAD.

Please refer to the SUPPLEMENTAL DATA or ACCESSION NUMBERS section of the manuscript for a link to these materials.
